# Supplementary material for: Lowering barometric pressure induces neuronal activation in the superior vestibular nucleus in mice
Source: PubMed Central journal article supplement (PMC6347159; doi:10.1371/journal.pone.0211297), 2019-01-25
Supplement: pone.0211297.s001.pdf [file pone.0211297.s001.pdf]

S1 Table

| female         |      |     |     |      | male           |      |     |     |      |
|----------------|------|-----|-----|------|----------------|------|-----|-----|------|
| mouse No.      | SuVe | LVe | MVe | SpVe | mouse No.      | SuVe | LVe | MVe | SpVe |
| control 1      | 14   | 7   | 28  | 58   | control 1      | 12   | 6   | 260 | 84   |
| control 2      | 9    | 14  | 82  | 108  | control 2      | 20   | 9   | 372 | 110  |
| control 3      | 6    | 1   | 131 | 63   | control 3      | 18   | 2   | 154 | 35   |
| control 4      | 5    | 2   | 49  | 83   | control 4      | 12   | 7   | 36  | 24   |
| control 5      | 14   | 4   | 93  | 65   | control 5      | 8    | 3   | 188 | 26   |
| control 6      | 22   | 5   | 218 | 39   | control 6      | 5    | 3   | 24  | 14   |
| control 7      | 13   | 2   | 147 | 22   | control 7      | 20   | 4   | 139 | 51   |
| control 8      | 19   | 4   | 397 | 66   | control 8      | 24   | 8   | 153 | 89   |
| low pressure 1 | 18   | 12  | 54  | 82   | control 9      | 23   | 2   | 122 | 61   |
| low pressure 2 | 25   | 6   | 176 | 120  | low pressure 1 | 15   | 5   | 112 | 35   |
| low pressure 3 | 23   | 3   | 116 | 89   | low pressure 2 | 14   | 7   | 99  | 87   |
| low pressure 4 | 16   | 7   | 46  | 70   | low pressure 3 | 18   | 3   | 33  | 15   |
| low pressure 5 | 20   | 5   | 224 | 45   | low pressure 4 | 30   | 3   | 191 | 33   |
| low pressure 6 | 21   | 5   | 116 | 45   | low pressure 5 | 21   | 5   | 111 | 17   |
| low pressure 7 | 23   | 11  | 229 | 30   | low pressure 6 | 14   | 4   | 60  | 23   |
| low pressure 8 | 16   | 7   | 188 | 47   | low pressure 7 | 36   | 7   | 309 | 99   |
|                |      |     |     |      | low pressure 8 | 25   | 10  | 128 | 54   |
|                |      |     |     |      | low pressure 9 | 22   | 3   | 196 | 66   |
