# Supplementary material for: Lowering barometric pressure induces neuronal activation in the superior vestibular nucleus in mice
Source: PubMed Central journal article supplement (PMC6347159; doi:10.1371/journal.pone.0211297), 2019-01-25
Supplement: pone.0211297.s002.pdf [file pone.0211297.s002.pdf]

S2 Table

|        | control     | low pressure |
|--------|-------------|--------------|
| Female | 452.671875  | 994.453125   |
|        | 371.484375  | 160.328125   |
|        | 702.109375  | 139.15625    |
|        | 184.703125  | 114.65625    |
|        | 379.953125  | 159.34375    |
|        | 205.6875    | 456.25       |
|        | 1060.75     | 139.03125    |
|        | 214.3554688 | 508.296875   |
| Male   | 358.890625  | 721.1992188  |
|        | 1276.894531 | 73.26953125  |
|        | 1059.160156 | 509.4960938  |
|        | 558.3007813 | 1035.023438  |
|        | 109.5       | 1658.839844  |
|        | 537.296875  | 1036.242188  |
|        | 523.671875  | 591.4335938  |
|        | 3274.898438 | 351.75       |
|        | 90.50390625 | 415.421875   |
